# Supplementary material
Source: PubMed Central journal article supplement (PMC2729357)
Supplement: NIHMS110574-supplement-erratum.pdf [file NIHMS110574-supplement-erratum.pdf]

An error appeared in print issue of the supplement to the 1 January 2009 issue of the journal (*Clin Infect Dis* 2009;48[Suppl 1]). On the cover of the supplement, the phrase “Proceedings of the HAI Summit” was incorrectly added below the subtitle.

The correct full title of the supplement is “Antiviral Therapy for Influenza: Challenging the Status Quo.” The publisher regrets this error.

An error appeared in the 1 October 2008 issue of the journal (Marra CM, Maxwell CL, Tantaló LC, Sahi SK, Lukehart SA. Normalization of serum rapid plasma reagin titer predicts normalization of cerebrospinal fluid and clinical abnormalities after treatment of neurosyphilis. *Clin Infect Dis* 2008;47:893–9). In

table 4, the 4th row of the column labeled “Variable taken into account in addition to normalization of serum RPR titer” should read “High pretreatment value” (not “High pretreatment RPR titer”). The journal regrets this error.

Two errors appeared in the 1 April 2009 issue of the journal (Senneville E, Morant H, Descamps D, et al. Needle puncture and transcutaneous bone biopsy cultures are inconsistent in patients with diabetes and suspected osteomyelitis of the foot. *Clin Infect Dis* 2009;48:888–93). First, in the Results section of the abstract, the 5th sentence should read, “Among the 21 patients with positive bone biopsy specimens, 13 (61.9%) had positive needle puncture samples” (not “Among the 20 patients

with positive bone biopsy specimens (69%), 13 had positive needle puncture samples”). Second, the 12th sentence of the Results section should read, “Thirteen (61.9%) of the 21 patients with culture-positive bone biopsy specimens also had culture-positive needle puncture specimens” (not “Thirteen (69%) of the 20 patients with culture-positive bone biopsy specimens also had culture-positive needle puncture specimens”). The authors regret these errors.
